# Supplementary material for: The Evaluation of the Relationship Between Parents’ Decisions to Administer Routine Childhood Vaccines and Their Attitudes Toward COVID-19 Vaccines
Source: Research Square preprint supplement (doi:10.21203/rs.3.rs-8376508/v1), 2026-01-13
Supplement: Supplementary file 1 [file f02d15f2d7f4fe00a750aa57.docx]

# Supplementary File 1 – English Version of the Questionnaire

This questionnaire was administered online using Google Forms and translated into English for submission.

SECTION 1 – RESPONDENT INFORMATION

1. Survey Number:

2. Personal Information:

3. Group: Study / Control

4. Age:

5. Marital Status: Single / Married / Divorced / Widowed

6. Education Level: Illiterate / Literate / Primary School / Secondary School / High School / University or Above

7. Occupation:

- None

- Healthcare worker in a public institution

- Healthcare worker in a private institution

- Non-healthcare worker in a public institution

- Non-healthcare worker in a private institution

- Self-employed

8. Currently employed in an income-generating job: Yes / No

9. Monthly Income: None / 0–4500 TL / 4500–7000 TL / Above 7000 TL

10. Health insurance: Yes / No

11. Chronic illness: Yes / No

12. Spouse’s occupation

- None

- Healthcare worker in a public institution

- Healthcare worker in a private institution

- Non-healthcare worker in a public institution

- Non-healthcare worker in a private institution

- Self-employed

13. Age at marriage:

14. Number of children:

15. Child for whom this survey is completed:

SECTION 2 – CHILDREN’S AGES

16. Age of Child 1:

17. Age of Child 2:

18. Age of Child 3:

19. Age of Child 4:

20. Age of Child 5:

SECTION 3 – CHILDREN’S HEALTH

21. Do any of your children have a chronic illness? If yes, specify.

22. Does the child for whom this survey is completed have a chronic illness? If yes, specify.

SECTION 4 – VACCINATION INFORMATION

23. Have you ever had your children vaccinated? Yes / No

24. If no, does your spouse support this decision? Yes / No

25. Have you experienced any side effects from vaccines? Yes / No

26. If yes, which of the following?

- Fever

- Allergy

- Shortness of breath

- Nausea / Vomiting

- Swelling or redness at injection site

- Other

SECTION 5 – VACCINATION DETAILS

27. Vaccines not administered to your child:

Hepatitis A, Hepatitis B, BCG, PCV, DTaP-IPV-Hib, OPV, Chickenpox, MMR, Pentavalent, Tdap, Influenza, Meningitis vaccines, Rotavirus, HPV, All, Do not know names

28. Reasons for not administering vaccines: (Answers were evaluated based on which vaccine was not administered.)

- Missed timing

- Working hours

- Distrust of vaccine contents

- Fear of side effects

- Child’s chronic illness

- Doctor did not recommend

- Religious reasons

- Social media influence

- Other

SECTION 6 – COVID-19

29. Someone close infected with COVID-19: Yes / No

30. Death due to COVID-19 in close circle: Yes / No

31. COVID-19 vaccination received: Yes / No

32. Vaccine type received:

- Two doses CoronaVac

- Three doses CoronaVac

- Two doses CoronaVac + one dose Pfizer-BioNTech

- Two doses Pfizer-BioNTech

- Other combinations

33. Reason for not receiving COVID-19 vaccine:

- Distrust

- Fear of side effects

- Chronic illness concern

- Doctor’s advice

- Religious reasons

- Social media influence

- Other

34. After COVID-19 pandemic, did your attitude toward childhood vaccination change? Yes / No

SECTION 7- The Parents' Attitudes Towards Childhood Vaccinations (PACV) Scale

1. Have you ever postponed your child’s vaccination for a reason other than illness or allergy?
   (Yes / No / I don’t know)
2. Have you ever not had your child vaccinated for a reason other than illness or allergy?
   (Yes / No / I don’t know)
3. How confident are you that the vaccination schedule provided free of charge in our country is appropriate for your child? Please rate on a scale from 0 to 10.
   (0 = Not confident at all, 10 = Completely confident)
4. I think children receive more vaccines than necessary.
   (Strongly agree / Agree / Neutral / Disagree / Strongly disagree)
5. I believe that many serious diseases are prevented thanks to vaccines.
   (Strongly agree / Agree / Neutral / Disagree / Strongly disagree)
6. I believe that it is better for my child to gain immunity by having the disease rather than through vaccination.
   (Strongly agree / Agree / Neutral / Disagree / Strongly disagree)
7. I believe it is better for children to receive fewer vaccines at one time.
   (Strongly agree / Agree / Neutral / Disagree / Strongly disagree)
8. Are you concerned that your child may experience a serious side effect after vaccination?
   (Very concerned / Concerned / Neutral / Not concerned / Not concerned at all)
9. Are you concerned that any childhood vaccine may not be safe?
   (Very concerned / Concerned / Neutral / Not concerned / Not concerned at all)
10. Are you concerned that any childhood vaccine may not be effective in preventing disease?
    (Very concerned / Concerned / Neutral / Not concerned / Not concerned at all)
11. If you had another child today, would you want them to receive all the recommended vaccines?
    (Yes / No / I don’t know)
12. Overall, how concerned are you about childhood vaccines?
    (Very concerned / Concerned / Neutral / Not concerned / Not concerned at all)
13. I trust the information I receive about vaccines.
    (Strongly agree / Agree / Neutral / Disagree / Strongly disagree)
14. I can openly discuss my concerns about vaccines with my child’s doctor.
    (Strongly agree / Agree / Neutral / Disagree / Strongly disagree)
15. Overall, how much do you trust your child’s doctor? Please rate on a scale from 0 to 10.
    (0 = Do not trust at all, 10 = Completely trust)

SECTION 8 - Attitudes Toward COVID-19 Vaccine Scale

1. I would like my family members to receive the vaccine that has been developed / will be developed for this disease. (Strongly agree / Agree / Neutral / Disagree / Strongly disagree)
2. I would like to receive the vaccine that has been developed / will be developed for this disease at the first opportunity. (Strongly agree / Agree / Neutral / Disagree / Strongly disagree)
3. I believe that everyone should receive the vaccine that has been developed / will be developed for this disease. (Strongly agree / Agree / Neutral / Disagree / Strongly disagree)
4. I trust the information and statements made about the vaccine that has been developed / will be developed. (Strongly agree / Agree / Neutral / Disagree / Strongly disagree)
5. I believe that the vaccine that has been developed / will be developed may cause transmission of the disease. (Strongly agree / Agree / Neutral / Disagree / Strongly disagree) (reverse-coded items)
6. I think that the vaccine that has been developed / will be developed does not / will not have a protective effect. (Strongly agree / Agree / Neutral / Disagree / Strongly disagree) (reverse-coded items)
7. I believe that the vaccine that has been developed / will be developed is dangerous. (Strongly agree / Agree / Neutral / Disagree / Strongly disagree) (reverse-coded items)
8. I think that the effectiveness of the vaccine that has been developed / will be developed has not been / will not be adequately tested. (Strongly agree / Agree / Neutral / Disagree / Strongly disagree) (reverse-coded items)
9. I believe that I can overcome the outbreak without being vaccinated. (Strongly agree / Agree / Neutral / Disagree / Strongly disagree) (reverse-coded items)
